# Supplementary material for: A Ropy Exopolysaccharide-Producing Strain Bifidobacterium pseudocatenulatum Bi-OTA128 Alleviates Dextran Sulfate Sodium-Induced Colitis in Mice
Source: MDPI journal article supplement (doi:10.3390/nu15234993), 2023-12-01
Supplement: s1 [file s1]

# A Ropy Exopolysaccharide-Producing Strain *Bifidobacterium pseudocatenulatum* Bi-OTA128 Alleviates Dextran Sulfate Sodium-Induced Colitis in Mice

Hui Wang <sup>1</sup>, Xinyuan Zhang <sup>1</sup>, Xinfang Kou <sup>1</sup>, Zhengyuan Zhai <sup>1,\*</sup> and Yanling Hao <sup>2,3,\*</sup>

<sup>1</sup> College of Food Science and Nutritional Engineering, China Agricultural University, Beijing 100083, China

<sup>2</sup> Key Laboratory of Precision Nutrition and Food Quality, Department of Nutrition and Health, China Agricultural University, Beijing 100083, China

<sup>3</sup> Food Laboratory of Zhongyuan, Luohe 462300, China

\* Correspondence: zhaizy@cau.edu.cn (Z.Z.); haoyl@cau.edu.cn (Y.H.)

## Materials and Methods

### Isolation and purification of EPS from *B. pseudocatenulatum* Bi-OTA128

The isolation of EPS from *B. pseudocatenulatum* Bi-OTA128 was performed as follows. After incubation at 37°C for 3 days, the biomass of Bi-OTA128 was collected from the surface of agar-MRSc plates by adding ultrapure water. The ultrasonic treatment at 50W power in 3-5 s pulses for 6 min was performed to release EPS from bacterial surface. Then cell-free supernatants were collected after centrifugation at 12,000×g, 4°C for 30 min. The proteins in supernatants were precipitated by adding trichloroacetic acid (TCA) at final concentration of 4% (v/v). After 2 h incubation at 4°C, the supernatants were collected by centrifugation at 6,000×g for 15 min. Subsequently, three volumes of cold absolute ethanol were added and kept at 4°C for 2 days to precipitate crude EPS. Finally, the EPS pellet was collected by centrifugation at 3,000×g, 4°C for 10 min, dialyzed against distilled water (Mw cut-off: 8,000-14,000 Da) at 4°C for 3 days, and lyophilized to obtain a crude EPS.

DNase (2.5 µg/mL) and Pronase E (50 µg/mL) were applied to remove nucleic acid and protein in crude EPS by sequentially incubated at 37°C for 6 h. The enzymes were further removed by TCA precipitation. EPS solution (2 mg/mL in ultrapure water) was then subjected to a DEAE-Sepharose Fast Flow anion exchange column (1.0×30 cm, Solarbio) and eluted with a step gradient NaCl solution (0, 0.1, 0.3, and 0.5 M) at flow rate of 1 mL/min. The eluted fractions belonging to single absorption peaks were collected according to the elution curve plotting by phenol-sulfuric acid assay (detected at 490 nm). The purified EPS component was then dialyzed and lyophilized.

## Assessment of EPS Produced by *B. pseudocatenulatum* Bi-OTA128 on LPS-Induced Inflammation in RAW 264.7 Cells

The murine macrophage cell line RAW 264.7 was obtained from MeisenCTCC (Zhejiang, China) and cultured in Dulbecco's modified Eagle medium (DMEM; Gibco, USA) which was supplemented with 10% (v/v) fetal bovine serum and 1% penicillin/streptomycin at 37°C in a 5% CO<sub>2</sub> humidified incubator. Cells were sub-cultured over three passages and harvested when it reached 70-80% confluency.

RAW264.7 macrophages ( $5 \times 10^4$  cells per well) were pre-incubated in 96-well plates for 14 h. After washed twice with phosphate buffered saline (PBS, pH 7.2), cells were simultaneously treated with 1 µg/mL lipopolysaccharide (LPS) and EPS at concentrations of 50, 100, 200, and 400 µg/mL (dissolved in DMEM medium) and incubated at 37°C, 5% CO<sub>2</sub> for 24 h. The DMEM medium and only LPS-treated cells were used as blank and positive control, respectively. After incubation, the levels of nitric oxide (NO) production and cytokines TNF-α, IL-1β, and IL-6 in supernatants were determined using NO detection kit (Elabsience Biotechnology Co. Ltd, Wuhan, China) or commercially procured ELISA kits (Elabsience) in accordance with manufacturer's instructions.

**Table S1.** Disease activity index (DAI) scoring system

| Score | Body weight change <sup>a</sup> | Stool Consistency            | Stool Occult Blood <sup>b</sup>                    |
|-------|---------------------------------|------------------------------|----------------------------------------------------|
| 0     | None body weight loss           | Granular hard stools         | No stool occult blood                              |
| 1     | 1–5% body weight loss           | Soft stools, granular shapes | Color change from light green to green within 10 s |
| 2     | 6–10% body weight loss          | Very soft, shapeless stools  | Color change from green to blue within 30 s        |
| 3     | 11–18% body weight loss         | Watery stools (Diarrhea)     | Color change from green to dark blue immediately   |
| 4     | > 18% body weight loss          |                              | Visible rectal bleeding                            |

<sup>a</sup> Body weight change was compared with the body weight at Day 14 before DSS treatment.

<sup>b</sup> The hemoccult positive degree was assessed by using the Fecal Occult Blood Test Kit (Brybio, Beijing, China) based on color change.

**Table S2.** Histological scores of colon damage

| Score | Inflammation severity                           | Inflammation extent                                     | Crypt damage                              |
|-------|-------------------------------------------------|---------------------------------------------------------|-------------------------------------------|
| 0     | None inflammation                               | None inflammation                                       | Intact crypt, no damage                   |
| 1     | Mild inflammation with slight lesion sites      | Inflammation observed only in mucosa                    | Basal 1/3 crypt damaged                   |
| 2     | Moderate inflammation with several lesion sites | Inflammation observed in mucosa and submucosa positions | Basal 2/3 crypt damaged                   |
| 3     | Severe inflammation with whole colonic damage   | Inflammation observed in transmural colonic tissues     | Crypt lost but surface epithelium present |
| 4     |                                                 |                                                         | Crypt and surface epithelium lost         |

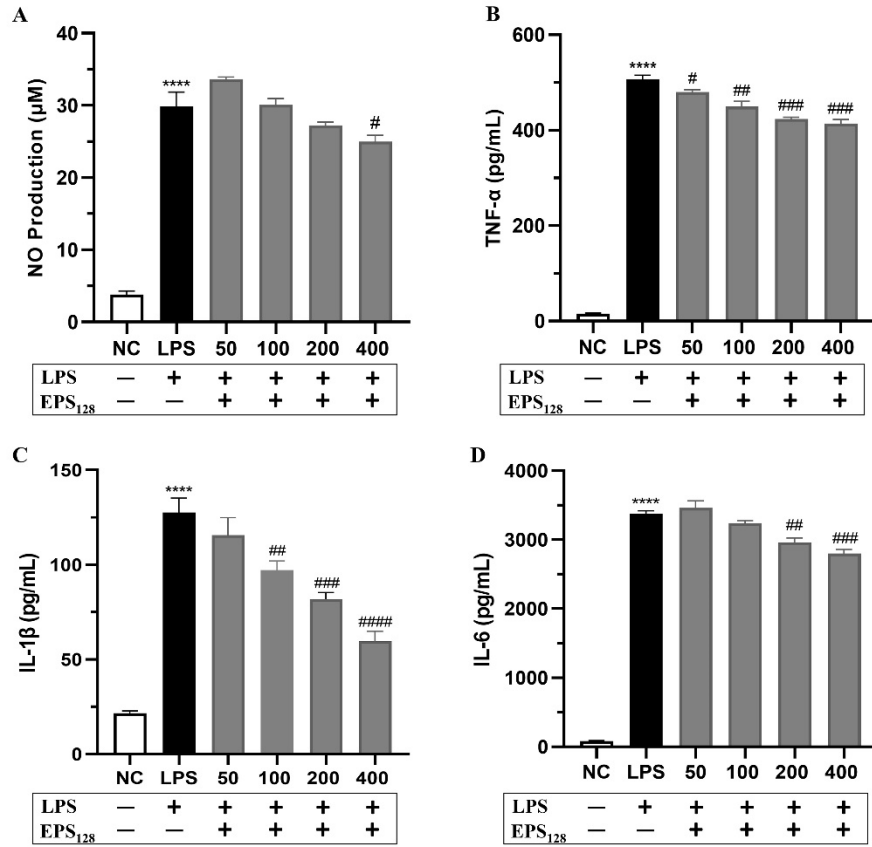

**Figure S1.** Effects of EPS produced by *B. pseudocatenulatum* strain Bi-OTA128 on inflammatory cytokines production in LPS-induced RAW264.7 cells. (A) NO production, (B) TNF-α, (C) IL-1β, and (D) IL-6 levels in culture supernatants after incubation at 37°C, 5% CO<sub>2</sub> for 24 h. n = 3. \*\*\*\*  $p < 0.0001$  compared with the NC group. #  $p < 0.05$ , ##  $p < 0.01$ , ###  $p < 0.001$ , and ####  $p < 0.0001$  showed significant difference compared with the LPS group. NC, negative control group; LPS, lipopolysaccharide.
